# Supplementary material for: Extracellular sphingomyelinase activity impairs TNF-α-induced endothelial cell death via ADAM17 activation and TNF receptor 1 shedding
Source: PubMed Central journal article supplement (PMC5641154; doi:10.18632/oncotarget.19983), 2017-08-07
Supplement: oncotarget-08-72584-s001.pdf [file oncotarget-08-72584-s001.pdf]

# Extracellular sphingomyelinase activity impairs TNF- $\alpha$ -induced endothelial cell death via ADAM17 activation and TNF receptor 1 shedding

## SUPPLEMENTARY MATERIALS

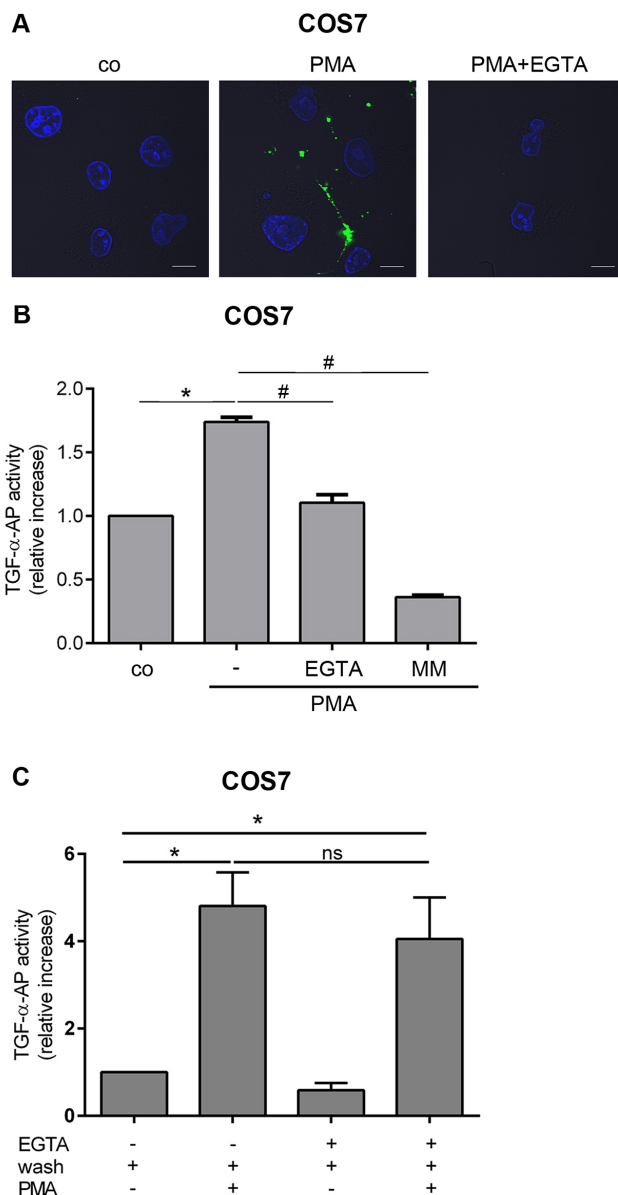

**Supplementary Figure 1:** (A) COS7 cells were stimulated with PMA (200 ng/ml) in the presence or absence of EGTA (10 mM) for 60 min and analyzed for PS exposure via Annexin-V staining. Scale bars: 10  $\mu$ m. (B) COS7 cells were stimulated as described in the presence or absence of EGTA (10 mM) or marimastat (MM, 10  $\mu$ M) and analyzed for release of the transfected AP-tagged TGF- $\alpha$ . (C) COS7 cells were incubated with EGTA (10 mM) for 30 min and washed 3 times with PBS. Thereafter, cells were stimulated with PMA as described and shedding of AP-tagged TGF- $\alpha$  was quantified. \* indicates a significant increase compared to control. # indicates a significant reduction in comparison to the stimulated sample (\*/#:  $p < 0.05$ ). ns = no significant differences. Data are represented as mean  $\pm$  SEM (n=3).

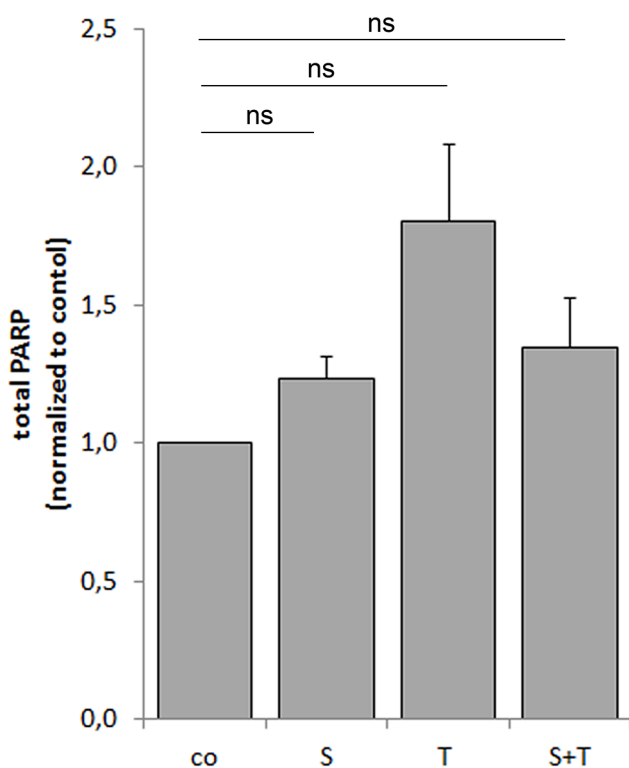

**Supplementary Figure 2: Quantification of total PARP-1.** HUVECs were pretreated with SMase (S, 0.1 U/ml, 2 h) and stimulated with TNF- $\alpha$  (T, 40 ng/ml + CHX (5  $\mu$ g/ml) for 4 h, followed by lysis and Western blot analyses. Densitometric analysis of total PARP-1 protein (cleaved PARP plus full length PARP) of 4 independent experiments. No significant differences were observed. ns = no significant differences. Data are represented as mean  $\pm$  SEM (n=4).

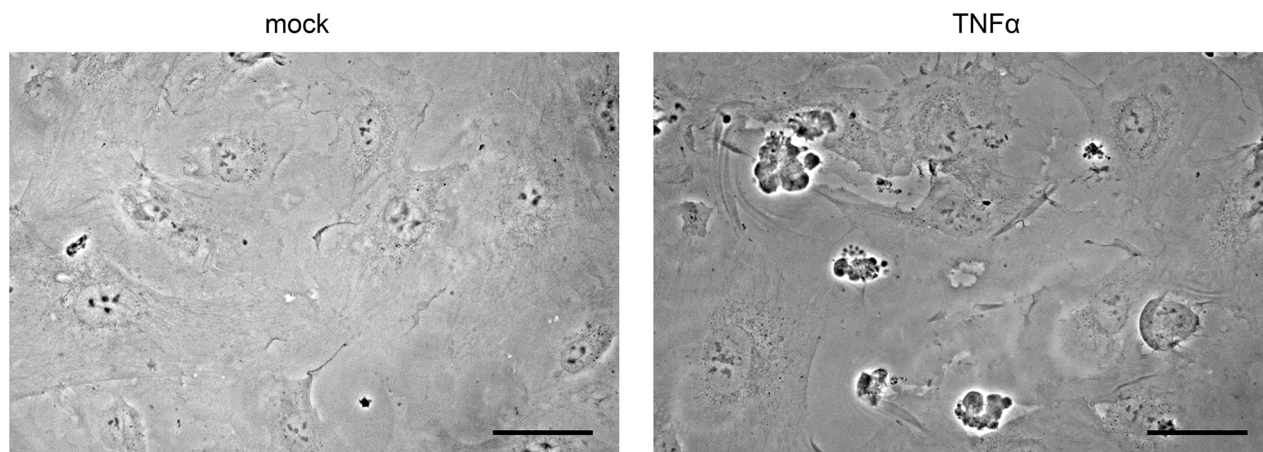

**Supplementary Figure 3: Images of TNF- $\alpha$ -induced cell membrane blebbing.** HUVECs were stimulated with TNF- $\alpha$  (T, 40 ng/ml) + CHX (5  $\mu$ g/ml) for 4h and photographs were taken. Scale bars, 20  $\mu$ m.
